# Supplementary material for: Use of motorised transport and pathways to childbirth care in health facilities: Evidence from the 2018 Nigeria Demographic and Health Survey
Source: PLOS Glob Public Health. 2022 Sep 21;2(9):e0000868. doi: 10.1371/journal.pgph.0000868 (PMC10021361; doi:10.1371/journal.pgph.0000868)
Supplement: S1 Data — (DO) [file pgph.0000868.s009.do]

****PATHWAYS TO CHILDBIRTH CARE; A DESCRIPTIVE ANALYSIS USING 2018 NIGERIA DHS*******

*****TABLE FROM DHS REPORT****

**Housekeeping**
version 16
capture log close
set more off
cd "/Users/ke-on/Documents/Stata/PROJECT"
clear


******Selection of Variables***
use "NigeriaBR.dta"


******Selection of Variables***
keep caseid v001 v005 v011 v012 v013 v021 v022 v023 v101 v102 v106 v130 v131 v149 v190 v201 v224 v467* v468 v501 v502 v504 v701 v714 v717 v719 v731 v739 v743* bidx* bord* b0* b1 b2 b3 b5 b6 b7 midx* m2* m3* m13 m14* m15* m17 m17a m19 m42* m43 m44 m57* m61 m62 m63 m64 m70 m71 m74 m75 m76 m77 m78* sstate idx94* s220b* s430a s430b s430c s430d s430e* s430g s433a

*************************************
*Labelling Analysis Variables*
****label of selected variables***
label variable v001 "Cluster number"
label variable v005 "Sample weight"
label variable v021 "PSU"
label variable v022 "Strata for sampling errors"


*renaming and calculation of weight
gen weight=v005/1000000
rename v022 strata
rename v021 psu


**survey setting the dataset**
svyset psu [pw=weight], strata(strata)
svydescribe

*
***********************************

*RE-CATEGORIZING VARIABLES*

*Birth index
tab midx

**restricting dataset to the last delivery
drop if midx>1
tab midx, missing

*
*FACILITY-BASED DELIVERIES FOR THE LAST BIRTH*

*
***Place of Delivery. regrouping of 
**re-categorizing place of delivery
tab m15
tab m15, nolabel
gen place_delivery=m15

*combining categories i.e respondent's home + other home; other public sector + health post; and private hospital + other private sector*
recode place 11/12=11 23 26=23 31/36=31


*define labels for new variable
label define place_delivery 11 "Home" 21 "government hospital" 22 "government health centre" 23 "government health post/other public sector" 31 "Private Sector/Other private sector" 96 "Other"

label values place_delivery place_delivery
tab place_delivery
tab place_delivery [iw=weight]
tab place_delivery, missing

*

***coding for facility deliveries****
tab place_delivery, missing
tab place_delivery, nolabel

*creating a variable to combine all facility deliveries
gen facility=2

*facility delivery coding
replace facility=1 if place_delivery==21 | place_delivery==22 | place_delivery==23 | place_delivery==31 

*home delivery coding
replace facility=0 if place_delivery==11  | place_delivery==96

tab facility
tab facility, missing
replace facility=. if facility==2

label define facility 1 "All facility deliveries" 0 "Home/other"
label values facility facility
tab facility
tab facility [iw=weight]
label variable facility "combined variable for all facility deliveries"


*
**Alternative description of dataset by type of facility delivery
tab place_delivery
tab place_delivery, nolabel

*coding for type of facility delivery
gen facility_type=5
replace facility_type=1 if place_delivery==21
replace facility_type=2 if place_delivery==22
replace facility_type=3 if place_delivery==23
replace facility_type=4 if place_delivery==31
tab facility_type

replace facility_type=. if facility_type==5
tab facility_type

label define facility_type 1 "government hospital" 2 "government health centre" 3 "government health post/other public sector" 4 "private sector"
label values facility_type facility_type

tab facility_type
tab facility_type [iw=weight]
label variable facility_type "type of facility for all facility deliveries"

*


**Coding of referral information*
tab s430a
tab s430a, missing
tab s430a, nolabel


**this variable has 90 missing values specific to all facility deliveries**
*investigating distribution of missing values

tab s430a s430b if facility==1 [iw=weight], missing
tab s430a facility, col missing
tab s430a facility [iw=weight], col missing


*Coding for referral 
gen referral=s430a

*recoding to combine referrals from non-facility location + don't know + home. 

*****missing values are ignored. **

recode referral 2 3 8=0 
tab referral

*accounting for missing values of referral variable specific to base of all facility deliverires 
tab referral facility, missing 
replace referral=9 if referral==. & facility==1
tab referral


*label values
label define referral 0 "Came from home/non-facility location" 1 "Came from another health facility" 9 "Missing"
label values referral referral
tab referral
tab referral, missing
label variable referral "place before facility of delivery"

*
*Referred or Not (combine missing values with people who came from home)
*tab referral
*tab referral, nolabel
*recode referral 0 9=0
*tab referral

*
***Variables for facility to facility referrals***

***facility of referral***
tab s430b
tab s430b,nolabel
gen refer_facility=s430b

*combing private hospital + other private; no formal referral + other
recode refer_facility 31 36=31  41 96=96 

label define refer_facility 21 "government hospital" 22 "government health center" 23 "government health post" 31 "private medical sector" 96 "no formal referral/other"

label values refer_facility refer_facility
tab refer_facility
*

**
*
*
**Means of transport**
*NOTE:total respondents=8,911 (all facility births) This has 90 missing values. The same missing values as seen for referral data for all women who delivered in a health facilily. 


*mode of transport
tab s430ea
rename s430ea transport_ambulance
tab s430eb
rename s430eb transport_privatecar_truck
tab s430ec
rename s430ec transport_taxi
tab s430ed
rename s430ed transport_tricycle
tab s430ee
rename s430ee transport_motorcyle_scooter
tab s430ef
rename s430ef transport_boat_with_motor
tab s430eg
rename s430eg transport_bus
tab s430eh
rename s430eh transport_bicycle
tab s430ei
rename s430ei transport_canoe
tab s430ej
rename s430ej transport_animal_cart
tab s430ek
rename s430ek transport_walking
tab s430el
rename s430el transport_carried
tab s430ex
rename s430ex transport_other
tab s430ez
rename s430ez transport_dont_know


*motorised transport summarised
tab transport_ambulance [iw=weight]
tab transport_privatecar_truck [iw=weight]
tab transport_taxi [iw=weight]
tab transport_tricycle [iw=weight]
tab transport_motorcyle_scooter [iw=weight]
tab transport_boat_with_motor [iw=weight]
tab transport_bus [iw=weight]


*non-motorised transport summarised
tab transport_bicycle [iw=weight]
tab transport_canoe [iw=weight]
tab transport_animal_cart [iw=weight]
tab transport_walking [iw=weight]
tab transport_carried [iw=weight]
tab transport_other [iw=weight]
tab transport_dont_know [iw=weight]

*

**Grouping of modes of transport*
generate transport_type=2

replace transport_type=0 if transport_bicycle==1 | transport_canoe==1 | transport_animal_cart==1 | transport_walking==1 | transport_carried==1 | transport_other==1

replace transport_type=1 if transport_ambulance==1 | transport_privatecar_truck==1 | transport_taxi==1 | transport_tricycle==1 | transport_motorcyle_scooter==1 | transport_boat_with_motor==1 | transport_bus==1


*Generate variable with all motorised transport together
gen motorised=.
replace motorised=1 if transport_ambulance==1
replace motorised=2 if transport_privatecar_truck==1
replace motorised=3 if transport_taxi==1
replace motorised=4 if transport_tricycle==1
replace motorised=5 if transport_motorcyle_scooter==1
replace motorised=6 if transport_boat_with_motor==1
replace motorised=7 if transport_bus==1
replace motorised=8 if transport_type==0

tab motorised

label define motorised 1 "Ambulance" 2 "Private care/truck" 3 "taxi" 4 "tricycle" 5 "motorcyle/scooter" 6 "boat with motor" 7 "bus" 8 "non-motorised transport"
label values motorised motorised
tab motorised
tab motorised [iw=weight]

*tab transport_type
*label define transport_type 0 "home births and non-motorized transport" 1 "motorized transport" 2 "none selected"
*label values transport_type transport_type

tab transport_type
tab transport_type if facility==1
tab transport_type if facility==1 [iw=weight]

*checking for missing values*
tab transport_type referral, missing

*recoding all missing values to null for both transport and referral
replace transport_type=. if transport_type==2 & facility==1

tab referral
tab referral, nolabel
recode referral 9=.


*checking
tab transport_type
tab transport_type [iw=weight]

tab referral
tab referral [iw=weight]


*
*adding home deliveries to non-motorised transport
recode transport_type 2=0

tab transport_type
tab transport_type [iw=weight]

label define transport_type 0 "home births + non-motorized transport" 1 "motorized transport"
label values transport_type transport_type

tab transport_type
tab transport_type, missing


*transport type for whole sample
tab transport_type [iw=weight]


*transport type for facility births only
tab transport_type if facility==1 [iw=weight]


*
*Summary of all transport variables
gen number_transport= transport_ambulance + transport_privatecar_truck + transport_taxi + transport_tricycle + transport_motorcyle_scooter + transport_boat_with_motor + transport_bus + transport_bicycle + transport_canoe + transport_animal_cart + transport_walking + transport_carried + transport_other + transport_dont_know
*
tab number_transport
tab number_transport, missing
tab number_transport [iw=weight]
sum number_transport

*Summary of motorised transport*
gen num_motorised_transport= transport_ambulance + transport_privatecar_truck + transport_taxi + transport_tricycle + transport_motorcyle_scooter + transport_boat_with_motor + transport_bus

tab num_motorised_transport
tab num_motorised_transport [iw=weight] 
*31 women used two different means of motorised transport to get to their final facility of delivery*

*
tab facility [iw=weight]
tab transport_type facility, col
 
*

*
*DEMOGRAPHICS*

*age groups with age at which mother gave birth**
browse v011 b3
gen agec=(b3-v011)/12
browse agec v012 v011
sum agec, detail
*mean age at birth = 25.4
gen agegroup=agec
recode agegroup min/14.999999=0 15/19.999999=1 20/24.999999=2 25/29.999999=3 30/34.999999=4 35/39.999999=5 40/44.999999=6 45/49.9999999=7
label define agegroup 0 "less than 15" 1 "15-19" 2 "20-24" 3 "25-29" 4 "30-34" 5 "35-39" 6 "40-44" 7 "45-49"
label values agegroup agegroup
tab agegroup
tab agegroup, missing
*

*re-grouping of age categories*
tab agegroup
tab agegroup, nolabel
gen age=agegroup
recode age 0/1=1 2/3=2 4/5=3 6/7=4
label define age 1 "less than 20" 2 "20-29" 3 "30-39" 4 "40-49"
label values age age
tab age
label variable age "mothers age at birth grouped"
*


**Education***
tab v106
tab v106, nolabel
gen education=v106
recode education 2/3=2
label define education 0 "no education" 1 "primary" 2 "secondary/higher"
label values education education
tab education
*


*wealth index
tab v190
gen wealth=v190
label define wealth 1 "Lowest" 2 "Second" 3 "Middle" 4 "Fourth" 5 "Highest"
label values wealth wealth
tab wealth
*


***Residence**
tab v102
rename v102 residence
tab residence
*


******Religion***
tab v130
tab v130, nolabel
gen religion=v130

*combine catholic + other christian; traditionalist + other
recode religion 1/2=1 4 96=4
label define religion 1 "christian" 3 "islam" 4 "traditional/other"
label values religion religion
tab religion
*


****marital status**********
tab v502
rename v502 marital
tab marital
*
*
*
***STATE**
**recategorising cities into broader state variables**


**north central
tab sstate
tab sstate,nolabel

gen nc=.
replace nc=1 if sstate==140
replace nc=2 if sstate==180
replace nc=3 if sstate==190
replace nc=4 if sstate==200
replace nc=5 if sstate==150
replace nc=6 if sstate==130
replace nc=7 if sstate==160

*labels
label define northcentral 1 "FCT Abuja" 2 "Benue" 3 "Kogi" 4 "Kwara" 5 "Nasarawa" 6 "Niger" 7 "Plateau"
label values nc northcentral
rename nc northcentral
tab northcentral


**north east
gen ne=.
replace ne=1 if sstate==70
replace ne=2 if sstate==90
replace ne=3 if sstate==60
replace ne=4 if sstate==80
replace ne=5 if sstate==170
replace ne=6 if sstate==50
*lables
label define northeast 1 "Adamawa" 2 "Bauchi" 3 "Borno" 4 "Gombe" 5 "Taraba" 6 "Yobe"
label values ne northeast
rename ne northeast
tab northeast


**north west
gen nw=.
replace nw=1 if sstate==40
replace nw=2 if sstate==110
replace nw=3 if sstate==100
replace nw=4 if sstate==30
replace nw=5 if sstate==120
replace nw=6 if sstate==10
replace nw=7 if sstate==20
*labels
label define northwest 1 "Jigawa" 2 "Kaduna" 3 "Kano" 4 "Katsina" 5 "Kebbi" 6 "Sokoto" 7 "Zamfara"
label values nw northwest
rename nw northwest
tab northwest


**south east
gen se=.
replace se=1 if sstate==310
replace se=2 if sstate==260
replace se=3 if sstate==280
replace se=4 if sstate==270
replace se=5 if sstate==320
*labels
label define southeast 1 "Abia" 2 "Anambra" 3 "Ebonyi" 4 "Enugu" 5 "Imo"
label values se southeast
rename se southeast
tab southeast


***south south
gen ss=.
replace ss=1 if sstate==300
replace ss=2 if sstate==340
replace ss=3 if sstate==290
replace ss=4 if sstate==350
replace ss=5 if sstate==250
replace ss=6 if sstate==330
*labels
label define southsouth 1 "Akwa Ibom" 2 "Bayelsa" 3 "Cross River" 4 "Delta" 5 "Edo" 6 "Rivers"
label values ss southsouth
rename ss southsouth
tab southsouth


**south west
gen sw=.
replace sw=1 if sstate==230
replace sw=2 if sstate==360
replace sw=3 if sstate==370
replace sw=4 if sstate==240
replace sw=5 if sstate==220
replace sw=6 if sstate==210
*labels
label define southwest 1 "Ekiti" 2 "Lagos" 3 "Ogun" 4 "Ondo" 5 "Osun" 6 "Oyo"
label values sw southwest
rename sw southwest
tab southwest


*
*
*Region
rename v101 region
tab region
*


*Parity*
tab v201
gen parity=v201
recode parity 2/3=2 4/5=3 6/17=4
label define parity 1 "1" 2 "2-3" 3 "4-5" 4 "6 or more"
label values parity parity
tab parity
*
*


*ANTE-NATAL AND POST-NATAL CARE ((only for most recent birth N=21,792)
*
***antenatal attendance**
tab m14
gen antenatal_attend=m14
recode antenatal_attend 1 2 3 98=1 4/7=2 8/20=3 
label define antenatal_attend 0 "None" 1 "1-3" 2 "4-7" 3 "8+" 
label values antenatal_attend antenatal_attend 
tab antenatal_attend


*
*Location of Antenatal care**
gen antenatal=.

*coding for women who did not have any antenatal care
replace antenatal=0 if m14==0

*coding for various locations of antenal care
replace antenatal=1 if m57a==1
replace antenatal=2 if m57b==1
replace antenatal=3 if m57e==1
replace antenatal=4 if m57f==1
replace antenatal=5 if m57g==1
replace antenatal=6 if m57h==1
replace antenatal=7 if m57m==1
replace antenatal=8 if m57n==1
replace antenatal=9 if m57x==1
tab antenatal

*combining home + other home; gov't health post + other public sector; private hospital + other private medical
recode antenatal 1 2=1 5 6=5 7 8=7
tab antenatal

label define antenatal 0 "None" 1 "Home" 3 "government hospital" 4 "government health centre" 5 "government health post/other public sector" 7 "private medical sector" 9 "Other"
label values antenatal antenatal
tab antenatal
label variable antenatal "location of antental"
tab antenatal
*
*


*Initial facility woman reported to deliver*

*where did the woman give birth
tab facility_type
tab facility_type, nolabel

gen intended=5

*combining facility of delivery with facility of referral to create initial intended facility of delivery
replace intended=1 if facility_type==1 | refer_facility==21
replace intended=2 if facility_type==2 | refer_facility==22
replace intended=3 if facility_type==3 | refer_facility==23
replace intended=4 if facility_type==4 | refer_facility==31
tab intended
tab intended if midx==1 [iw=weight]
replace intended=. if intended==5
tab intended

label define intended 1 "government hospital" 2 "government health center" 3 "government health post/other public" 4 "private sector"
label values intended intended
label variable intended "Intended place of delivery"
tab intended
*
*Place of delivery
tab place_delivery
*


***caesarian sections***
***********************
tab m17
tab m17 facility, col
tab m17, nolabel

*proportion of caesarean sections in whole sample
gen caesarean=m17
tab caesarean
label define caesarean 0 "No" 1 "Yes"
label values caesarean caesarean
tab caesarean
tab caesarean [iw=weight]
*has 88 missing values

*caesarean section for facility deliveries only
tab caesarean if facility==1 [iw=weight]
tab caesarean if facility==1 [iw=weight], missing 

*
*
*
*****Neonatal death***
*****************************
*generating early neonatal mortality using DHS formula (from day 1 to 7 mortalities)
gen neo_death=(inrange(b6,100,130))
*
tab neo_death
tab b5

*confirming with child survival variable in dataset
tab neo_death b5
*
tab neo_death
gen neonatal=neo_death
tab neonatal
*
label define neonatal 0 "Alive" 1 "Dead"
label values neonatal neonatal
label variable neonatal "Neonatal death"
tab neonatal

*no missing values
tab neonatal, missing

*restricting neonatal deaths to most recent births
replace neonatal=. if midx>1 &midx!=.
tab neonatal

*neonatal deaths for facility births
tab neonatal facility, col missing

tab neonatal [iw=weight]
tab neonatal if facility==1, missing
tab neonatal if facility==1 [iw=weight]


*
*multiple gestation
tab b0
tab b0, nolabel
gen mult_ges=b0
recode mult_ges 1/3=1
tab mult_ges
label define mult_ges 0 "single birth" 1 "multiple birth"
label values mult_ges mult_ges
tab mult_ges
*restrict multiple gestation to most recent births
replace mult_ges=. if midx>1
tab mult_ges
tab mult_ges [iw=weight]


*
*All complications
tab caesarean
tab caesarean, nolabel
tab mult_ges
tab mult_ges, nolabel
tab neonatal
tab neonatal, nolabel

gen complication=2
replace complication=1 if caesarean==1 | mult_ges==1 | neonatal==1
tab complication
tab complication if midx==1
recode complication 2=0
tab complication
label define complication 0 "No complication" 1 "At least 1 complication"
label values complication complication
tab complication if midx==1
tab complication if midx==1 [iw=weight]


gen total_comp=caesarean+mult_ges+neonatal
tab total_comp
sum total_comp

*
*
*Summary of Data
tab place_delivery [iw=weight]
tab facility [iw=weight]
tab facility_type [iw=weight]
tab referral [iw=weight]
tab refer_facility [iw=weight]
tab transport_type [iw=weight]
tab transport_type if facility==1 [iw=weight]
tab transport_type if referral==1 [iw=weight]
tab intended [iw=weight]

*Sankey Diagram statistics

*home and facility deliveries
tab facility [iw=weight]

*initial facility for all women
tab intended [iw=weight]

*final facility for women who were not referred
tab facility_type if referral==0 [iw=weight]

*facility of referral for referred women
tab refer_facility [iw=weight]
tab refer_facility, nolabel

tab facility_type if refer_facility==21 [iw=weight]
tab facility_type if refer_facility==22 [iw=weight]
tab facility_type if refer_facility==23 [iw=weight]
tab facility_type if refer_facility==31 [iw=weight]
tab facility_type if refer_facility==96 [iw=weight]

*Motorised transport*

tab transport_type [iw=weight]
tab facility_type [iw=weight]

tab transport_type facility [iw=weight], col

*Non-referred
tab facility_type transport_type if referral==0 [iw=weight]

*Referred
tab refer_facility transport_type [iw=weight]
tab facility_type transport_type if referral==1 [iw=weight]


*

*DESCRIPTIVE TABLES
*Sociodemographics of all women in the sample

svy: tab age facility, percent count col
tab age facility [iw=weight], col
svy: tab education facility, percent count col
svy: tab religion facility, percent count col
tab religion facility [iw=weight], col
svy: tab wealth facility, percent count col
svy: tab marital facility, percent count col
tab marital facility [iw=weight], col
*
svy: tab residence facility, percent count col
tab residence facility [iw=weight], col
svy: tab region facility, percent count col
*
svy: tab parity facility, percent count col
svy: tab antenatal_attend facility, percent count col
tab antenatal_attend facility [iw=weight], col
svy: tab antenatal facility, percent count col
*
*
svy: tab complication facility, percent count col
tab complication facility if midx==1 [iw=weight], col
*
svy: tab intended facility, percent count col
svy: tab facility_type facility, percent count col
tab facility_type facility [iw=weight], col
svy: tab transport_type facility, percent col count
tab transport_type facility [iw=weight], col

*********************
*
*
*Referral Descriptive column percentages
tab referral [iw=weight]
svy: tab age referral, percent col count
svy: tab education referral, percent col count
svy: tab religion referral, percent col count
svy: tab wealth referral, percent col count
svy: tab marital referral, percent col count
svy: tab residence referral, percent col count
svy: tab region referral, percent col count
*
svy: tab parity referral, percent col count
svy: tab antenatal referral, percent col count
svy: tab antenatal_attend referral, percent col count
*
svy: tab caesarean referral, percent col count
svy: tab neonatal referral, percent col count
svy: tab mult_ges referral, percent col count
*
svy: tab complication referral, percent col count
*
svy: tab intended referral, percent col count
svy: tab facility_type referral, percent col count
svy: tab transport_type referral, percent col count
*
*
*


*
*Investigating various transport media
svy: tab transport_ambulance referral, percent col count
svy: tab transport_privatecar_truck referral, percent col count
svy: tab transport_taxi referral, percent col count
svy: tab transport_tricycle referral, percent col count
svy: tab transport_motorcyle_scooter referral, percent col count
svy: tab transport_boat_with_motor referral, percent col count
svy: tab transport_bus referral, percent col count
svy: tab transport_bicycle referral, percent col count
svy: tab transport_canoe referral, percent col count
svy: tab transport_animal_cart referral, percent col count
svy: tab transport_walking referral, percent col count
svy: tab transport_carried referral, percent col count
svy: tab transport_other referral, percent col count


tab transport_type referral [iw=weight], col missing


*Bivariate
*proportions of motorized transport in total sample (row)
tab transport_type [iw=weight]
svy: tab age transport_type, percent row count
tab age transport_type [iw=weight], row
svy: tab education transport_type, percent row count
svy: tab religion transport_type, percent row count
tab religion transport_type [iw=weight], row
svy: tab wealth transport_type, percent row count
svy: tab marital transport_type, percent row count
tab marital transport_type [iw=weight], row
svy: tab residence transport_type, percent row count
tab residence transport_type [iw=weight], row
svy: tab region transport_type, percent row count
*
svy: tab parity transport_type, percent row count
svy: tab antenatal transport_type, percent row count
svy: tab antenatal_attend transport_type, percent row count
tab antenatal_attend transport_type [iw=weight], row
*

*
svy: tab complication transport_type, percent row count
tab complication transport_type [iw=weight], row
*
*
*
svy: tab intended transport_type, percent row count
svy: tab facility_type transport_type, percent row count
svy: tab referral transport_type, percent row count
*


******
*For facility births only
tab transport_type [iw=weight]
tab facility
svy: tab age transport_type if facility==1, percent row count
svy: tab education transport_type if facility==1, percent row count
svy: tab religion transport_type if facility==1, percent row count
svy: tab wealth transport_type if facility==1, percent row count
svy: tab marital transport_type if facility==1, percent row count
svy: tab residence transport_type if facility==1, percent row count
svy: tab region transport_type if facility==1, percent row count
*
svy: tab parity transport_type if facility==1, percent row count
svy: tab antenatal transport_type if facility==1, percent row count
svy: tab antenatal_attend transport_type if facility==1, percent row count
*
*
svy: tab complication transport_type if facility==1, percent row count
*
svy: tab intended transport_type if facility==1, percent row count
svy: tab facility_type transport_type if facility==1, percent row count
svy: tab referral transport_type if facility==1, percent row count
*
*
*

*Referral transport proportions
tab transport_type [iw=weight]
tab referral [iw=weight]
tab facility
svy: tab age transport_type if referral==1, percent row count
svy: tab education transport_type if referral==1, percent row count
svy: tab religion transport_type if referral==1, percent row count
svy: tab wealth transport_type if referral==1, percent row count
svy: tab marital transport_type if referral==1, percent row count
svy: tab residence transport_type if referral==1, percent row count
svy: tab region transport_type if referral==1, percent row count
*
svy: tab parity transport_type if referral==1, percent row count
svy: tab antenatal transport_type if referral==1, percent row count
svy: tab antenatal_attend transport_type if referral==1, percent row count
*

*
svy: tab complication transport_type if referral==1, percent col count
*
svy: tab intended transport_type if referral==1, percent row count
svy: tab facility_type transport_type if referral==1, percent row count


*investigating region
tab region referral, row chi

tab complication
tab complication,nolabel

*crude odds ratios of motorized transport
svy: logistic transport_type ib2.region, base
svy: logistic transport_type i.religion, base
svy: logistic transport_type i.wealth, base
svy: logistic transport_type i.education, base
svy: logistic transport_type i.residence, base
svy: logistic transport_type ib2.age, base
svy: logistic transport_type i.parity, base
svy: logistic transport_type i.antenatal_attend, base
*

svy: logistic transport_type i.complication, base
*
svy: logistic transport_type i.facility_type, base
svy: logistic transport_type i.referral, base


*crude odds ratios of motorized transport for only facility births (model 2)
svy: logistic transport_type ib2.region if facility==1, base
svy: logistic transport_type i.religion if facility==1, base
svy: logistic transport_type i.wealth if facility==1, base
svy: logistic transport_type i.education if facility==1, base
svy: logistic transport_type i.residence if facility==1, base
svy: logistic transport_type ib2.age if facility==1, base
svy: logistic transport_type i.parity if facility==1, base
svy: logistic transport_type i.antenatal_attend if facility==1, base
*

svy: logistic transport_type i.complication if facility==1, base
*
svy: logistic transport_type i.facility_type if facility==1, base
svy: logistic transport_type i.referral if facility==1, base


*Multivariate models for motorized transport
*Exploring confounders model


*region
svy: logistic transport_type ib2.region, base
testparm ib6.region

*religion
svy: logistic transport_type ib2.region i.religion, base
testparm i.religion

*wealth
svy: logistic transport_type ib2.region i.religion i.wealth, base
testparm i.wealth

*education
svy: logistic transport_type ib2.region i.religion i.wealth i.education, base
testparm i.education

*residence
svy: logistic transport_type ib2.region i.religion i.wealth i.education i.residence, base
testparm i.residence

*age
svy: logistic transport_type ib2.region i.religion i.wealth i.education i.residence ib2.age, base
testparm ib2.age
*

*Pregnancy related factors

*parity model
svy: logistic transport_type ib2.region i.religion i.wealth i.education i.residence ib2.age i.parity, base
testparm i.parity

*
*Antenatal attendance model
svy: logistic transport_type ib2.region i.religion i.wealth i.education i.residence ib2.age i.parity i.antenatal_attend, base
testparm i.antenatal_attend

*
*Combined complication model
svy: logistic transport_type ib2.region i.religion i.wealth i.education i.residence ib2.age i.parity i.antenatal_attend i.complication, base
testparm i.complication
*
*
*
* FINAL MODEL FOR ALL BIRTHS
svy: logistic transport_type ib2.region i.religion i.wealth i.education i.residence ib2.age i.parity i.antenatal_attend i.complication, base
*
*


*MODEL 2 FOR FACILITY ONLY

*Multivariate models for motorized transport
*Exploring confounders model

*region
svy: logistic transport_type ib2.region if facility==1, base
testparm ib6.region

*religion
svy: logistic transport_type ib2.region i.religion if facility==1, base
testparm i.religion

*wealth
svy: logistic transport_type ib2.region i.religion i.wealth if facility==1, base
testparm i.wealth

*education
svy: logistic transport_type ib2.region i.religion i.wealth i.education if facility==1, base
testparm i.education

*residence
svy: logistic transport_type ib2.region i.religion i.wealth i.education i.residence if facility==1, base
testparm i.residence

*age model
svy: logistic transport_type ib2.region i.religion i.wealth i.education i.residence ib2.age if facility==1, base
testparm ib2.age
*

*test for parity
svy: logistic transport_type ib2.region i.religion i.wealth i.education i.residence ib2.age i.parity if facility==1, base
testparm i.parity

*test for antenatal attendance
svy: logistic transport_type ib2.region i.religion i.wealth i.education i.residence ib2.age i.parity i.antenatal_attend if facility==1, base
testparm i.antenatal_attend

*
*test for facility of delivery
svy: logistic transport_type ib2.region i.religion i.wealth i.education i.residence ib2.age i.parity i.antenatal_attend i.facility_type if facility==1, base
testparm i.facility_type

*test for referral
svy: logistic transport_type ib2.region i.religion i.wealth i.education i.residence ib2.age i.parity i.antenatal_attend i.facility_type i.referral if facility==1, base
testparm i.referral
*
*test for complication
svy: logistic transport_type ib2.region i.religion i.wealth i.education i.residence ib2.age i.parity i.antenatal_attend i.facility_type i.referral i.complication if facility==1, base
testparm i.complication
*

*FINAL MODEL FOR FACILITY BIRTHS ONLY
svy: logistic transport_type ib2.region i.religion i.wealth i.education i.residence ib2.age i.parity i.antenatal_attend i.facility_type i.referral i.complication if facility==1, base


*Transport variables for region and referral
svy: tab region transport_type, percent col count
svy: tab residence transport_type, percent col count
svy: tab wealth transport_type, percent col count
svy: tab referral transport_type, percent col count
svy: tab refer_facility transport_type, percent col count


*Transport variable appendix (proportion of types of transport)
svy: tab motorised if facility==1, percent col count
svy: tab region motorised if facility==1, percent row count
svy: tab residence motorised if facility==1, percent row count
svy: tab wealth motorised if facility==1, percent row count
svy: tab referral motorised if facility==1, percent row count
svy: tab refer_facility motorised if facility==1, percent row count

*Motorized transport

*ambulance
svy: tab region transport_ambulance, percent row count
svy: tab residence transport_ambulance, percent row count
svy: tab wealth transport_ambulance, percent row count
svy: tab referral transport_ambulance, percent row count
svy: tab refer_facility transport_ambulance, percent row count

*private car
svy: tab region transport_privatecar_truck, percent row count
svy: tab residence transport_privatecar_truck, percent row count
svy: tab wealth transport_privatecar_truck, percent row count
svy: tab referral transport_privatecar_truck, percent row count
svy: tab refer_facility transport_privatecar_truck, percent row count

*taxi
svy: tab region transport_taxi, percent row count
svy: tab residence transport_taxi, percent row count
svy: tab wealth transport_taxi, percent row count
svy: tab referral transport_taxi, percent row count
svy: tab refer_facility transport_taxi, percent row count

*tricycle
svy: tab region transport_tricycle, percent row count
svy: tab residence transport_tricycle, percent row count
svy: tab wealth transport_tricycle, percent row count
svy: tab referral transport_tricycle, percent row count
svy: tab refer_facility transport_tricycle, percent row count

*motorcyle/scooter
svy: tab region transport_motorcyle_scooter, percent row count
svy: tab residence transport_motorcyle_scooter, percent row count
svy: tab wealth transport_motorcyle_scooter, percent row count
svy: tab referral transport_motorcyle_scooter, percent row count
svy: tab refer_facility transport_motorcyle_scooter, percent row count

*boat with motor
svy: tab region transport_boat_with_motor, percent row count
svy: tab residence transport_boat_with_motor, percent row count
svy: tab wealth transport_boat_with_motor, percent row count
svy: tab referral transport_boat_with_motor, percent row count
svy: tab refer_facility transport_boat_with_motor, percent row count

*bus
svy: tab region transport_bus, percent row count
svy: tab residence transport_bus, percent row count
svy: tab wealth transport_bus, percent row count
svy: tab referral transport_bus, percent row count
svy: tab refer_facility transport_bus, percent row count

*Non-motorized transport

*bicycle
svy: tab region transport_bicycle, percent col count
svy: tab residence transport_bicycle, percent col count
svy: tab referral transport_bicycle, percent col count
svy: tab refer_facility transport_bicycle, percent col count

*canoe
svy: tab region transport_canoe, percent col count
svy: tab residence transport_canoe, percent col count
svy: tab referral transport_canoe, percent col count
svy: tab refer_facility transport_canoe, percent col count

*animal cart
svy: tab region transport_animal_cart, percent col count
svy: tab residence transport_animal_cart, percent col count
svy: tab referral transport_animal_cart, percent col count
svy: tab refer_facility transport_animal_cart, percent col count

*walking
svy: tab region transport_walking, percent col count
svy: tab residence transport_animal_cart, percent col count
svy: tab referral transport_animal_cart, percent col count
svy: tab refer_facility transport_animal_cart, percent col count

*carried
svy: tab region transport_carried, percent col count
svy: tab residence transport_carried, percent col count
svy: tab referral transport_carried, percent col count
svy: tab refer_facility transport_carried, percent col count

*other
svy: tab region transport_other, percent col count
svy: tab residence transport_other, percent col count
svy: tab referral transport_other, percent col count
svy: tab refer_facility transport_other, percent col count
